# Supplementary material for: Effect of using safely managed drinking water services on child diarrhoea
Source: Research Square preprint supplement (doi:10.21203/rs.3.rs-5366989/v1), 2024-11-15
Supplement: Supplementary file 1 [file ba45c92c06a01b308b5a5dda.xlsx]

## Sheet: Overview
Country	Children (n)	Diarrheal prevalence	Use of SMDWS at POC	Use of SMDWS at POU	E. coli contamination at POC	E. coli contamination at POU	Drinking water sufficiency	Accessibility on premises	Improved drinking water source use
							Drinking water sufficiency
Total	26796	0.131	0.273	0.194	0.53	0.702	0.855	0.559	0.828
Algeria	910	0.036	0.56	0.46	0.154	0.314	0.812	0.802	0.986
Bangladesh	1963	0.069	0.47	0.14	0.402	0.839	0.961	0.804	0.979
Central African Republic	653	0.23	0.01	0.003	0.686	0.877	0.613	0.078	0.588
Chad	1386	0.25	0.01	0.001	0.866	0.998	0.786	0.136	0.607
Gambia	1095	0.262	0.21	0.123	0.499	0.786	0.86	0.34	0.879
Georgia	402	0.144	0.56	0.537	0.308	0.361	0.848	0.923	0.97
Ghana	1536	0.182	0.13	0.088	0.486	0.801	0.898	0.227	0.861
Guinea-Bissau	1052	0.086	0.065	0.029	0.648	0.831	0.904	0.35	0.605
Guyana	428	0.11	0.269	0.189	0.626	0.738	0.876	0.841	0.907
Iraq	3487	0.134	0.4	0.341	0.46	0.55	0.765	0.878	0.99
Lao PDR	1292	0.065	0.13	0.118	0.853	0.854	0.94	0.848	0.826
Lesotho	387	0.075	0.19	0.163	0.375	0.568	0.891	0.248	0.85
Madagascar	1685	0.145	0.03	0.022	0.878	0.924	0.897	0.134	0.348
Mongolia	912	0.072	0.21	0.211	0.191	0.201	0.907	0.275	0.812
Nigeria	1263	0.131	0.04	0.015	0.762	0.934	0.855	0.285	0.627
Pakistan Punjab	3288	0.134	0.48	0.314	0.357	0.592	0.925	0.781	0.988
Paraguay	631	0.108	0.48	0.395	0.423	0.521	0.834	0.93	0.945
São Tome and Principe	151	0.172	0.29	0.285	0.325	0.391	0.728	0.47	0.967
Sierra Leone	975	0.079	0.01	0.005	0.911	0.981	0.761	0.149	0.562
Suriname	651	0.086	0.41	0.246	0.496	0.68	0.823	0.975	0.977
Togo	476	0.164	0.05	0.029	0.689	0.926	0.849	0.155	0.733
Tunisia	602	0.095	0.57	0.495	0.226	0.311	0.812	0.879	0.973
West Bank and Gaza	681	0.138	0.69	0.599	0.189	0.311	0.877	0.95	1
Zimbabwe	890	0.142	0.09	0.055	0.573	0.852	0.797	0.315	0.763

## Sheet: Data-main model
Population Characteristics:	Total= 26796
Diarrhea = YES (%)	3503 (13.1)
Age group (%)
0-12 months	5448 (20.3)
12-24 months	5301 (19.8)
24-36 months	5448 (20.3)
36-48 months	5808 (21.7)
48-60 months	4791 (17.9)
Gender = Male (%)	13685 (51.1)
Living Area = Urban (%) (ref.: Rural)	10275 (38.3)
Wealth quintile (%)
Poorest	6971 (26.0)
2nd Poorest	5729 (21.4)
3rd Poorest	5328 (19.9)
4th Poorest	4604 (17.2)
Richest	4164 (15.5)
Mother Education Level = Secondary or higher (%) (ref.: Lower than secondary)	9172 (34.2)
Basic Hygiene = YES (%)	15905 (59.4)
Basic Sanitation = YES (%)	14111 (52.7)
30 day total precipitation in mm (mean (SD))	104.82 (144.48)
30 day mean temperature in Celcius prior to survey date (mean (SD))	29.47 (0.80)
Survey gathered within 30 days of the onset of a wet period = Yes (%)	6634 (24.8)
Exposure variables:
Drinking Water Service use at the point of collection (%)
Not using basic services	8027 (30.0)
Using SMDWS*	7320 (27.3)
At least basic/ not SMDWS	11449 (42.7)
Drinking Water Service use at the point of use (%)
Not using basic services	8027 (30.0)
Using SMDWS*	5204 (19.4)
At least basic but not SMDWS	13565 (50.6)
Fecal contamination at the point of collection = YES (%)	14214 (53.0)
Fecal contamination at the point of use= YES (%)	18807 (70.2)
Drinking Water Sufficient = YES (%)	22901 (85.5)
Improved Water Source = YES (%)	22179 (82.8)
Accessible On Premises = YES (%)	14992 (55.9)
Water Source Type (%)
Unimproved	4617 (17.2)
Improved/not piped	16494 (61.6)
Improved/piped	5685 (21.2)
*safely managed drinking water services

## Sheet: Data-climate zones
Population Characteristics:	Arid	Cold	Temperate	Tropical
	10617	213	4926	11557
Diarrhea = YES (%)	1386 (13.1)	17 ( 8.0)	450 ( 9.1)	1650 (14.9)
Age group (%)
0-12 months	2110 (19.9)	52 (24.4)	985 (20.0)	2301 (20.8)
12-24 months	2085 (19.6)	39 (18.3)	975 (19.8)	2202 (19.9)
24-36 months	2142 (20.2)	48 (22.5)	1044 (21.2)	2214 (20.1)
36-48 months	2363 (22.3)	35 (16.4)	1025 (20.8)	2385 (21.6)
48-60 months	1917 (18.1)	39 (18.3)	897 (18.2)	1938 (17.6)
Gender = Male (%)	5451 (51.3)	118 (55.4)	2627 (53.3)	5489 (49.7)
Living Area = Urban (%) (ref.: Rural)	4618 (43.5)	192 (90.1)	1823 (37.0)	3642 (33.0)
Wealth quintile (%)
Poorest	2941 (27.7)	7 ( 3.3)	984 (20.0)	3039 (27.5)
2nd Poorest	2500 (23.5)	62 (29.1)	1019 (20.7)	2148 (19.5)
3rd Poorest	2139 (20.1)	54 (25.4)	975 (19.8)	2160 (19.6)
4th Poorest	1794 (16.9)	31 (14.6)	953 (19.3)	1826 (16.5)
Richest	1243 (11.7)	59 (27.7)	995 (20.2)	1867 (16.9)
Mother Education Level = Secondary or higher (%) (ref.: Lower than secondary)	3358 (31.6)	181 (85.0)	2694 (54.7)	2939 (26.6)
Basic Hygiene = YES (%)	8772 (82.6)	184 (86.4)	3159 (64.1)	3790 (34.3)
Basic Sanitation = YES (%)	7252 (68.3)	162 (76.1)	2997 (60.8)	3700 (33.5)
30 day total precipitation in mm (mean (SD))	37.83 (48.17)	42.97 (36.26)	146.81 (152.61)	151.69 (175.07)
30 day mean temperature in Celcius prior to survey date (mean (SD))	29.12 (0.87)	27.20 (1.06)	29.20 (0.69)	29.98 (0.30)
Survey gathered within 30 days of the onset of a wet period = Yes (%)	3127 (29.5)	71 (33.3)	1509 (30.6)	1927 (17.5)
Exposure variables:
Drinking Water Service use at the point of collection (%)
Not using basic services	2016 (19.0)	44 (20.7)	1002 (20.3)	4965 (45.0)
Using SMDWS*	3866 (36.4)	67 (31.5)	1984 (40.3)	1403 (12.7)
At least basic/ not SMDWS	4735 (44.6)	102 (47.9)	1940 (39.4)	4672 (42.3)
Drinking Water Service use at the point of use (%)
Not using basic services	2016 (19.0)	44 (20.7)	1002 (20.3)	4965 (45.0)
Using SMDWS*	2959 (27.9)	67 (31.5)	1396 (28.3)	782 ( 7.1)
At least basic but not SMDWS	5642 (53.1)	102 (47.9)	2528 (51.3)	5293 (47.9)
Fecal contamination at the point of collection = YES (%)	6048 (57.0)	186 (87.3)	2681 (54.4)	3667 (33.2)
Fecal contamination at the point of use= YES (%)	4494 (42.3)	176 (82.6)	1773 (36.0)	1546 (14.0)
Drinking Water Sufficient = YES (%)	8850 (83.4)	169 (79.3)	4464 (90.6)	9418 (85.3)
Improved Water Source = YES (%)	9624 (90.6)	211 (99.1)	4367 (88.7)	7977 (72.3)
Accessible On Premises = YES (%)	7213 (67.9)	108 (50.7)	3547 (72.0)	4124 (37.4)
Water Source Type (%)
Unimproved	993 ( 9.4)	2 ( 0.9)	559 (11.3)	3063 (27.7)
Improved/not piped	6904 (65.0)	110 (51.6)	2735 (55.5)	6745 (61.1)
Improved/piped	2720 (25.6)	101 (47.4)	1632 (33.1)	1232 (11.2)
*safely managed drinking water services

## Sheet: Data-Wet Period
Survey gathered within 30 days of the onset of a wet period	No	Yes
n	20162	6634
Diarrhea = YES (%)	2695 (13.4)	808 ( 12.2)
Age group (%)
0-12 months	4163 (20.6)	1285 ( 19.4)
12-24 months	3973 (19.7)	1328 ( 20.0)
24-36 months	4101 (20.3)	1347 ( 20.3)
36-48 months	4341 (21.5)	1467 ( 22.1)
48-60 months	3584 (17.8)	1207 ( 18.2)
Gender = Male (%)	10212 (50.6)	3473 ( 52.4)
Living Area = Urban (%) (ref.: Rural)	7143 (35.4)	3132 ( 47.2)
Wealth quintile (%)
Poorest	5340 (26.5)	1631 ( 24.6)
2nd Poorest	4267 (21.2)	1462 ( 22.0)
3rd Poorest	3980 (19.7)	1348 ( 20.3)
4th Poorest	3460 (17.2)	1144 ( 17.2)
Richest	3115 (15.4)	1049 ( 15.8)
Mother Education Level = Secondary or higher (%) (ref.: Lower than secondary)	6878 (34.1)	2294 ( 34.6)
Basic Hygiene = YES (%)	11228 (55.7)	4677 ( 70.5)
Basic Sanitation = YES (%)	9870 (49.0)	4241 ( 63.9)
30 day total precipitation in mm (mean (SD))	90.83 (141.94)	147.31 (143.85)
30 day mean temperature in Celcius prior to survey date (mean (SD))	29.44 (0.84)	29.58 (0.66)
Exposure variables:
Drinking Water Service use at the point of collection (%)
Not using basic services	6507 (32.3)	1520 ( 22.9)
Using SMDWS*	5246 (26.0)	2074 ( 31.3)
At least basic/ not SMDWS	8409 (41.7)	3040 ( 45.8)
Drinking Water Service use at the point of use (%)
Not using basic services	6507 (32.3)	1520 ( 22.9)
Using SMDWS*	3612 (17.9)	1592 ( 24.0)
At least basic but not SMDWS	10043 (49.8)	3522 ( 53.1)
Fecal contamination at the point of collection = YES (%)	10775 (53.4)	3439 ( 51.8)
Fecal contamination at the point of use= YES (%)	14368 (71.3)	4439 ( 66.9)
Drinking Water Sufficient = YES (%)	17469 (86.6)	5432 ( 81.9)
Improved Water Source = YES (%)	16350 (81.1)	5829 ( 87.9)
Accessible On Premises = YES (%)	10663 (52.9)	4329 ( 65.3)
Water Source Type (%)
Unimproved	3812 (18.9)	805 ( 12.1)
Improved/not piped	12585 (62.4)	3909 ( 58.9)
Improved/piped	3765 (18.7)	1920 ( 28.9)
*safely managed drinking water services

## Sheet: Data_Country_Level
Population Characteristics:	Algeria	Bangladesh	Central African Republic	Chad	Gambia	Georgia	Ghana	Guinea Bissau	Guyana	Iraq	Lao	Lesotho	Madagascar	Mongolia	Nigeria	Pakistan	Palestine	Paraguay	Sao Tome and Principe	Sierra Leone	Suriname	Togo	Tunisia	Zimbabwe	p
n	910	1963	653	1386	1095	402	1536	1052	428	3487	1292	387	1685	912	1263	3288	681	631	151	975	651	476	602	890
Diarrhea = YES (%)	33 ( 3.6)	136 ( 6.9)	150 (23.0)	347 (25.0)	287 (26.2)	58 (14.4)	280 (18.2)	88 ( 8.4)	47 (11.0)	467 (13.4)	84 ( 6.5)	29 ( 7.5)	245 (14.5)	66 ( 7.2)	165 (13.1)	439 (13.4)	94 ( 13.8)	68 (10.8)	26 (17.2)	77 ( 7.9)	56 ( 8.6)	78 (16.4)	57 ( 9.5)	126 (14.2)	<0.001
Age group (%)																									0.003
0-12 months	177 (19.5)	412 (21.0)	134 (20.5)	263 (19.0)	230 (21.0)	68 (16.9)	318 (20.7)	228 (21.7)	78 (18.2)	687 (19.7)	255 (19.7)	76 (19.6)	379 (22.5)	189 (20.7)	264 (20.9)	676 (20.6)	138 ( 20.3)	131 (20.8)	31 (20.5)	191 (19.6)	117 (18.0)	114 (23.9)	115 (19.1)	177 (19.9)
12-24 months	171 (18.8)	383 (19.5)	140 (21.4)	229 (16.5)	212 (19.4)	58 (14.4)	304 (19.8)	183 (17.4)	91 (21.3)	698 (20.0)	255 (19.7)	85 (22.0)	350 (20.8)	145 (15.9)	273 (21.6)	691 (21.0)	145 ( 21.3)	145 (23.0)	28 (18.5)	210 (21.5)	116 (17.8)	96 (20.2)	125 (20.8)	168 (18.9)
24-36 months	166 (18.2)	411 (20.9)	123 (18.8)	273 (19.7)	223 (20.4)	95 (23.6)	303 (19.7)	212 (20.2)	83 (19.4)	696 (20.0)	271 (21.0)	92 (23.8)	333 (19.8)	205 (22.5)	259 (20.5)	684 (20.8)	131 ( 19.2)	119 (18.9)	32 (21.2)	186 (19.1)	126 (19.4)	99 (20.8)	118 (19.6)	208 (23.4)
36-48 months	205 (22.5)	406 (20.7)	128 (19.6)	345 (24.9)	245 (22.4)	96 (23.9)	325 (21.2)	235 (22.3)	108 (25.2)	805 (23.1)	297 (23.0)	72 (18.6)	326 (19.3)	194 (21.3)	253 (20.0)	676 (20.6)	147 ( 21.6)	132 (20.9)	35 (23.2)	204 (20.9)	171 (26.3)	91 (19.1)	129 (21.4)	183 (20.6)
48-60 months	191 (21.0)	351 (17.9)	128 (19.6)	276 (19.9)	185 (16.9)	85 (21.1)	286 (18.6)	194 (18.4)	68 (15.9)	601 (17.2)	214 (16.6)	62 (16.0)	297 (17.6)	179 (19.6)	214 (16.9)	561 (17.1)	120 ( 17.6)	104 (16.5)	25 (16.6)	184 (18.9)	121 (18.6)	76 (16.0)	115 (19.1)	154 (17.3)
Gender = Male (%)	453 (49.8)	1033 (52.6)	319 (48.9)	671 (48.4)	541 (49.4)	205 (51.0)	752 (49.0)	504 (47.9)	221 (51.6)	1824 (52.3)	652 (50.5)	208 (53.7)	852 (50.6)	468 (51.3)	700 (55.4)	1719 (52.3)	369 ( 54.2)	330 (52.3)	67 (44.4)	481 (49.3)	320 (49.2)	247 (51.9)	309 (51.3)	440 (49.4)	0.015
Living Area = Urban (%) (ref.: Rural)	577 (63.4)	358 (18.2)	239 (36.6)	261 (18.8)	464 (42.4)	197 (49.0)	653 (42.5)	267 (25.4)	125 (29.2)	2274 (65.2)	357 (27.6)	94 (24.3)	382 (22.7)	452 (49.6)	314 (24.9)	889 (27.0)	479 ( 70.3)	377 (59.7)	82 (54.3)	307 (31.5)	339 (52.1)	146 (30.7)	379 (63.0)	263 (29.6)	<0.001
Wealth quintile (%)																									<0.001
Poorest	277 (30.4)	488 (24.9)	266 (40.7)	323 (23.3)	409 (37.4)	70 (17.4)	436 (28.4)	304 (28.9)	169 (39.5)	882 (25.3)	326 (25.2)	115 (29.7)	477 (28.3)	270 (29.6)	280 (22.2)	739 (22.5)	94 ( 13.8)	153 (24.2)	34 (22.5)	262 (26.9)	164 (25.2)	117 (24.6)	111 (18.4)	205 (23.0)
2nd Poorest	186 (20.4)	434 (22.1)	0 ( 0.0)	309 (22.3)	225 (20.5)	108 (26.9)	295 (19.2)	245 (23.3)	79 (18.5)	791 (22.7)	286 (22.1)	82 (21.2)	405 (24.0)	220 (24.1)	280 (22.2)	701 (21.3)	100 ( 14.7)	128 (20.3)	40 (26.5)	235 (24.1)	146 (22.4)	104 (21.8)	152 (25.2)	178 (20.0)
3rd Poorest	162 (17.8)	368 (18.7)	124 (19.0)	282 (20.3)	177 (16.2)	121 (30.1)	278 (18.1)	222 (21.1)	61 (14.3)	672 (19.3)	255 (19.7)	73 (18.9)	324 (19.2)	170 (18.6)	242 (19.2)	738 (22.4)	164 ( 24.1)	125 (19.8)	27 (17.9)	220 (22.6)	145 (22.3)	97 (20.4)	110 (18.3)	171 (19.2)
4th Poorest	168 (18.5)	367 (18.7)	0 ( 0.0)	228 (16.5)	153 (14.0)	52 (12.9)	242 (15.8)	169 (16.1)	55 (12.9)	604 (17.3)	241 (18.7)	70 (18.1)	275 (16.3)	144 (15.8)	257 (20.3)	615 (18.7)	170 ( 25.0)	122 (19.3)	28 (18.5)	135 (13.8)	108 (16.6)	92 (19.3)	126 (20.9)	183 (20.6)
Richest	117 (12.9)	306 (15.6)	263 (40.3)	244 (17.6)	131 (12.0)	51 (12.7)	285 (18.6)	112 (10.6)	64 (15.0)	538 (15.4)	184 (14.2)	47 (12.1)	204 (12.1)	108 (11.8)	204 (16.2)	495 (15.1)	153 ( 22.5)	103 (16.3)	22 (14.6)	123 (12.6)	88 (13.5)	66 (13.9)	103 (17.1)	153 (17.2)
Mother Education Level = Secondary or higher (%) (ref.: Lower than secondary)	106 (11.6)	1275 (65.0)	39 ( 6.0)	150 (10.8)	280 (25.6)	371 (92.3)	238 (15.5)	77 ( 7.3)	368 (86.0)	678 (19.4)	237 (18.3)	187 (48.3)	446 (26.5)	675 (74.0)	482 (38.2)	1159 (35.2)	542 ( 79.6)	326 (51.7)	71 (47.0)	101 (10.4)	228 (35.0)	147 (30.9)	392 (65.1)	597 (67.1)	<0.001
Basic Hygiene = YES (%)	761 (83.6)	1403 (71.5)	137 (21.0)	526 (38.0)	352 (32.1)	373 (92.8)	703 (45.8)	117 (11.1)	330 (77.1)	3391 (97.2)	639 (49.5)	43 (11.1)	323 (19.2)	741 (81.2)	114 ( 9.0)	2977 (90.5)	638 ( 93.7)	445 (70.5)	76 (50.3)	202 (20.7)	418 (64.2)	84 (17.6)	558 (92.7)	554 (62.2)	<0.001
Basic Sanitation = YES (%)	789 (86.7)	1146 (58.4)	65 (10.0)	155 (11.2)	350 (32.0)	364 (90.5)	237 (15.4)	516 (49.0)	366 (85.5)	3182 (91.3)	849 (65.7)	217 (56.1)	200 (11.9)	571 (62.6)	366 (29.0)	2120 (64.5)	655 ( 96.2)	362 (57.4)	56 (37.1)	115 (11.8)	535 (82.2)	52 (10.9)	576 (95.7)	267 (30.0)	<0.001
30 day total precipitation in mm (mean (SD))	40.68 (49.01)	105.60 (132.07)	77.34 (68.14)	133.31 (106.93)	15.11 (40.53)	104.12 (60.08)	91.81 (80.44)	6.87 (21.13)	278.26 (120.46)	49.55 (43.20)	466.62 (207.15)	44.79 (59.23)	38.68 (32.24)	15.49 (18.87)	134.01 (135.41)	18.88 (19.22)	142.35 (106.82)	74.23 (63.44)	61.60 (111.68)	341.15 (179.48)	248.60 (78.39)	210.22 (89.12)	37.50 (23.28)	145.52 (75.76)	<0.001
30 day mean temperature in Celcius prior to survey date (mean (SD))	28.21 (0.31)	29.78 (0.36)	30.27 (0.21)	30.34 (0.35)	30.23 (0.33)	28.24 (0.56)	30.06 (0.23)	30.07 (0.07)	29.87 (0.06)	29.46 (0.50)	29.68 (0.15)	28.02 (0.81)	29.68 (0.51)	27.18 (0.72)	30.04 (0.16)	28.86 (0.26)	28.70 (0.30)	29.21 (0.37)	29.85 (0.05)	29.94 (0.16)	29.85 (0.05)	29.87 (0.10)	28.88 (0.34)	29.79 (0.18)	<0.001
Survey gathered within 30 days of the onset of a wet period = Yes (%)	269 (29.6)	463 (23.6)	77 (11.8)	424 (30.6)	6 ( 0.5)	53 (13.2)	258 (16.8)	0 ( 0.0)	137 (32.0)	2047 (58.7)	333 (25.8)	20 ( 5.2)	87 ( 5.2)	86 ( 9.4)	63 ( 5.0)	178 ( 5.4)	403 ( 59.2)	22 ( 3.5)	8 ( 5.3)	493 (50.6)	293 (45.0)	134 (28.2)	297 (49.3)	483 (54.3)	<0.001
Exposure variables:
Drinking Water Service use at the point of collection (%)																									<0.001
Not using basic services	85 ( 9.3)	195 ( 9.9)	440 (67.4)	799 (57.6)	439 (40.1)	23 ( 5.7)	662 (43.1)	587 (55.8)	57 (13.3)	210 ( 6.0)	268 (20.7)	175 (45.2)	1279 (75.9)	379 (41.6)	687 (54.4)	300 ( 9.1)	7 ( 1.0)	36 ( 5.7)	30 (19.9)	610 (62.6)	22 ( 3.4)	257 (54.0)	47 ( 7.8)	433 (48.7)
Using SMDWS*	510 (56.0)	925 (47.1)	7 ( 1.1)	18 ( 1.3)	232 (21.2)	226 (56.2)	198 (12.9)	68 ( 6.5)	115 (26.9)	1385 (39.7)	167 (12.9)	73 (18.9)	52 ( 3.1)	189 (20.7)	53 ( 4.2)	1568 (47.7)	469 ( 68.9)	301 (47.7)	44 (29.1)	9 ( 0.9)	264 (40.6)	23 ( 4.8)	341 (56.6)	83 ( 9.3)
At least basic/ not SMDWS	315 (34.6)	843 (42.9)	206 (31.5)	569 (41.1)	424 (38.7)	153 (38.1)	676 (44.0)	397 (37.7)	256 (59.8)	1892 (54.3)	857 (66.3)	139 (35.9)	354 (21.0)	344 (37.7)	523 (41.4)	1420 (43.2)	205 ( 30.1)	294 (46.6)	77 (51.0)	356 (36.5)	365 (56.1)	196 (41.2)	214 (35.5)	374 (42.0)
Drinking Water Service use at the point of use (%)																									<0.001
Not using basic services	85 ( 9.3)	195 ( 9.9)	440 (67.4)	799 (57.6)	439 (40.1)	23 ( 5.7)	662 (43.1)	587 (55.8)	57 (13.3)	210 ( 6.0)	268 (20.7)	175 (45.2)	1279 (75.9)	379 (41.6)	687 (54.4)	300 ( 9.1)	7 ( 1.0)	36 ( 5.7)	30 (19.9)	610 (62.6)	22 ( 3.4)	257 (54.0)	47 ( 7.8)	433 (48.7)
Using SMDWS*	419 (46.0)	275 (14.0)	2 ( 0.3)	1 ( 0.1)	135 (12.3)	216 (53.7)	135 ( 8.8)	31 ( 2.9)	81 (18.9)	1188 (34.1)	152 (11.8)	63 (16.3)	37 ( 2.2)	192 (21.1)	19 ( 1.5)	1032 (31.4)	408 ( 59.9)	249 (39.5)	43 (28.5)	5 ( 0.5)	160 (24.6)	14 ( 2.9)	298 (49.5)	49 ( 5.5)
At least basic but not SMDWS	406 (44.6)	1493 (76.1)	211 (32.3)	586 (42.3)	521 (47.6)	163 (40.5)	739 (48.1)	434 (41.3)	290 (67.8)	2089 (59.9)	872 (67.5)	149 (38.5)	369 (21.9)	341 (37.4)	557 (44.1)	1956 (59.5)	266 ( 39.1)	346 (54.8)	78 (51.7)	360 (36.9)	469 (72.0)	205 (43.1)	257 (42.7)	408 (45.8)
Fecal contamination at the point of collection = YES (%)	140 (15.4)	789 (40.2)	448 (68.6)	1200 (86.6)	546 (49.9)	124 (30.8)	746 (48.6)	682 (64.8)	268 (62.6)	1604 (46.0)	1102 (85.3)	145 (37.5)	1479 (87.8)	174 (19.1)	963 (76.2)	1174 (35.7)	129 ( 18.9)	267 (42.3)	49 (32.5)	888 (91.1)	323 (49.6)	328 (68.9)	136 (22.6)	510 (57.3)	<0.001
Fecal contamination at the point of use= YES (%)	286 (31.4)	1646 (83.9)	573 (87.7)	1383 (99.8)	861 (78.6)	145 (36.1)	1231 (80.1)	874 (83.1)	316 (73.8)	1917 (55.0)	1104 (85.4)	220 (56.8)	1557 (92.4)	183 (20.1)	1180 (93.4)	1946 (59.2)	212 ( 31.1)	329 (52.1)	59 (39.1)	956 (98.1)	443 (68.0)	441 (92.6)	187 (31.1)	758 (85.2)	<0.001
Drinking Water Sufficient = YES (%)	739 (81.2)	1886 (96.1)	400 (61.3)	1090 (78.6)	942 (86.0)	341 (84.8)	1379 (89.8)	951 (90.4)	375 (87.6)	2666 (76.5)	1215 (94.0)	345 (89.1)	1512 (89.7)	827 (90.7)	1080 (85.5)	3040 (92.5)	597 ( 87.7)	526 (83.4)	110 (72.8)	742 (76.1)	536 (82.3)	404 (84.9)	489 (81.2)	709 (79.7)	<0.001
Improved Water Source = YES (%)	897 (98.6)	1922 (97.9)	384 (58.8)	841 (60.7)	962 (87.9)	390 (97.0)	1322 (86.1)	636 (60.5)	388 (90.7)	3452 (99.0)	1067 (82.6)	329 (85.0)	587 (34.8)	741 (81.2)	792 (62.7)	3248 (98.8)	681 (100.0)	596 (94.5)	146 (96.7)	548 (56.2)	636 (97.7)	349 (73.3)	586 (97.3)	679 (76.3)	<0.001
Accessible On Premises = YES (%)	730 (80.2)	1578 (80.4)	51 ( 7.8)	188 (13.6)	372 (34.0)	371 (92.3)	348 (22.7)	368 (35.0)	360 (84.1)	3062 (87.8)	1096 (84.8)	96 (24.8)	225 (13.4)	251 (27.5)	360 (28.5)	2568 (78.1)	647 ( 95.0)	587 (93.0)	71 (47.0)	145 (14.9)	635 (97.5)	74 (15.5)	529 (87.9)	280 (31.5)	<0.001
Water Source Type (%)																									<0.001
Unimproved	13 ( 1.4)	41 ( 2.1)	269 (41.2)	545 (39.3)	133 (12.1)	12 ( 3.0)	214 (13.9)	416 (39.5)	40 ( 9.3)	35 ( 1.0)	225 (17.4)	58 (15.0)	1098 (65.2)	171 (18.8)	471 (37.3)	40 ( 1.2)	0 ( 0.0)	35 ( 5.5)	5 ( 3.3)	427 (43.8)	15 ( 2.3)	127 (26.7)	16 ( 2.7)	211 (23.7)
Improved/not piped	372 (40.9)	1799 (91.6)	374 (57.3)	775 (55.9)	659 (60.2)	56 (13.9)	1243 (80.9)	581 (55.2)	290 (67.8)	1818 (52.1)	1022 (79.1)	246 (63.6)	544 (32.3)	566 (62.1)	792 (62.7)	2931 (89.1)	234 ( 34.4)	158 (25.0)	105 (69.5)	538 (55.2)	209 (32.1)	327 (68.7)	349 (58.0)	506 (56.9)
Improved/piped	525 (57.7)	123 ( 6.3)	10 ( 1.5)	66 ( 4.8)	303 (27.7)	334 (83.1)	79 ( 5.1)	55 ( 5.2)	98 (22.9)	1634 (46.9)	45 ( 3.5)	83 (21.4)	43 ( 2.6)	175 (19.2)	0 ( 0.0)	317 ( 9.6)	447 ( 65.6)	438 (69.4)	41 (27.2)	10 ( 1.0)	427 (65.6)	22 ( 4.6)	237 (39.4)	173 (19.4)
*safely managed drinking water services
